# Supplementary material for: Early splenectomy in a large cohort of children with sickle cell anemia: risks and consequences
Source: PubMed Central journal article supplement — Haematologica. 2023 May 25;108(12):3409–17. doi: 10.3324/haematol.2022.282556 (PMC10690920; doi:10.3324/haematol.2022.282556), 2023-05-25
Supplement: 2022_282556_MECHRAOUI_SUPPL.pdf [file 2022_282556_MECHRAOUI_SUPPL.pdf]

# Early splenectomy in a large cohort of children with sickle cell anemia: risks and consequences

Aimen Mechraoui,<sup>1</sup> Ghislaine Ithier,<sup>1</sup> Justine Pages,<sup>2</sup> Zinedine Haouari,<sup>1</sup> Liza Ali,<sup>3</sup> Arnaud Bonnard,<sup>3</sup> Malika Benkerrou,<sup>1,4</sup> Florence Missud,<sup>1</sup> Berengère Koehl,<sup>1,5</sup> Laurent Holvoet,<sup>1</sup> Enora Le Roux<sup>2,4</sup> and Valentine Brousse<sup>1,5</sup>

<sup>1</sup>Centre de Référence MCGRE, Service d'Hématologie-Immunologie, AP-HP, Hôpital Robert Debré, F-75019 Paris; <sup>2</sup>Clinical Epidemiology Unit, Robert Debré University Hospital, Inserm, CIC 1426, F-75019 Paris; <sup>3</sup>Service de Chirurgie, APHP, Hôpital Universitaire Robert Debré, F-75019 Paris; <sup>4</sup>Inserm, UMR-1123 ECEVE, Université Paris Cité, Paris and <sup>5</sup>Université Paris Cité and Université des Antilles, Inserm, BIGR, F-75015 Paris, France

**Correspondence:** V. Brousse  
[valentine.brousse@gmail.com](mailto:valentine.brousse@gmail.com)

**Received:** December 12, 2022.

**Accepted:** May 15, 2023.

**Early view:** May 25, 2023.

<https://doi.org/10.3324/haematol.2022.282556>

©2023 Ferrata Storti Foundation

Published under a CC BY-NC license

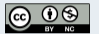

## Supplemental data

### Cases of splenectomy < 2 years

- First case was a child who had a 2<sup>nd</sup> attack of acute splenic sequestration while on a chronic transfusion program in addition to an unfavourable socio-economic situation that would not allow the family to urgently seek medical care in case of a 3<sup>rd</sup> recurrence.
- 2d case was a child on a chronic transfusion program who presented with delayed haemolytic transfusion reaction with acute splenomegaly.
- 3rd case was a child who presented a 4th episode of acute spleen sequestration with threatening anaemia (Hb 2.8 g/dl)

Supplemental Table 1: Indications for hematopoietic stem cell transplant in the cohort of splenectomized children

| Patients | Age at HSCT (years) | Indication                                                                                                  |
|----------|---------------------|-------------------------------------------------------------------------------------------------------------|
| 1        | 11,96               | severe symptomatic disease with multiple VOEs despite hydroxyurea necessitating chronic transfusion therapy |
| 2        | 9,88                | severe symptomatic disease despite hydroxyurea + alloimmunization (post splenectomy)                        |
| 3        | 11,78               | Symptomatic disease + allo immunisation (pre splenectomy)                                                   |
| 4        | 13,18               | Delayed Haemolytic Transfusion Reaction                                                                     |
| 5        | 3,98                | Cerebral vasculopathy (abnormal TCD)                                                                        |
| 6        | 12,35               | severe symptomatic disease with multiple VOEs despite hydroxyurea                                           |
| 7        | 7,44                | Renal insufficiency related to malformative uropathy                                                        |
| 8        | 7,12                | Cerebral vasculopathy (abnormal TCD)                                                                        |
| 9        | 3,08                | acute splenic sequestration                                                                                 |

VOE: vaso occlusive event; TCD : Trans cranial Doppler;

### Cases of splenectomy following one single episode of acute splenic sequestration (ASS):

- Case 1: severe ASS with acute threatening anaemia (Hb= 3,3 g/dl.)
- Case 2: severe ASS with acute threatening anaemia (Hb=1,5 g/dl.)
- Case 3: severe ASS with acute threatening anaemia (Hb= 4.7 g/dl.) and rare blood group phenotype (S-s-) and allo antibodies
- Case 4: severe ASS with acute threatening anaemia (Hb= 3,4 g/dl.)
